# Supplementary material for: Preconcentration-enhanced electrochemical detection of paraoxon in food and environmental samples using reduced graphene oxide-modified disposable sensors
Source: Royal Society of Chemistry journal article supplement (doi:10.1039/d4ay02240h), 2025-01-01
Supplement: d4ay02240h1.pdf [file d4ay02240h1.pdf]

*Supplementary material:*

***Preconcentration-Enhanced Electrochemical Detection of Paraoxon in Food and Environmental Samples Using Reduced Graphene Oxide-Modified Disposable Sensors***

*Rafael L. Zamboni<sup>a</sup>, Cristiane Kalinke<sup>a,b\*</sup>, Luis M. C. Ferreira<sup>a</sup>, Maurício A. P. Papi<sup>a</sup>, Elisa S. Orth<sup>a</sup>, Craig E. Banks<sup>c</sup>, Luiz H. Marcolino-Júnior<sup>a</sup> and Márcio F. Bergamini<sup>a\*</sup>*

**SUMMARY**

|                                                                        |   |
|------------------------------------------------------------------------|---|
| Graphene Oxide Synthesis (Figure S1) .....                             | 1 |
| SEM Analyses (Figure S2) .....                                         | 1 |
| Water Contact Angle Study (Figure S3) .....                            | 2 |
| Influence of the SPCE modified with rGO (Figure S4 and Table S1) ..... | 2 |
| Pulse current response (Figure S5) .....                               | 3 |
| Scan Rate Study (Figure S7) .....                                      | 4 |
| Interferents Study (Figure S8 and Table S2) .....                      | 5 |

---

\*Corresponding authors: [cristiane.kalinke@gmail.com](mailto:cristiane.kalinke@gmail.com) / [ckalinke@unicamp.br](mailto:ckalinke@unicamp.br) (C. Kalinke); [bergamini@ufpr.br](mailto:bergamini@ufpr.br) (M. F. Bergamini).

## Graphene Oxide Synthesis

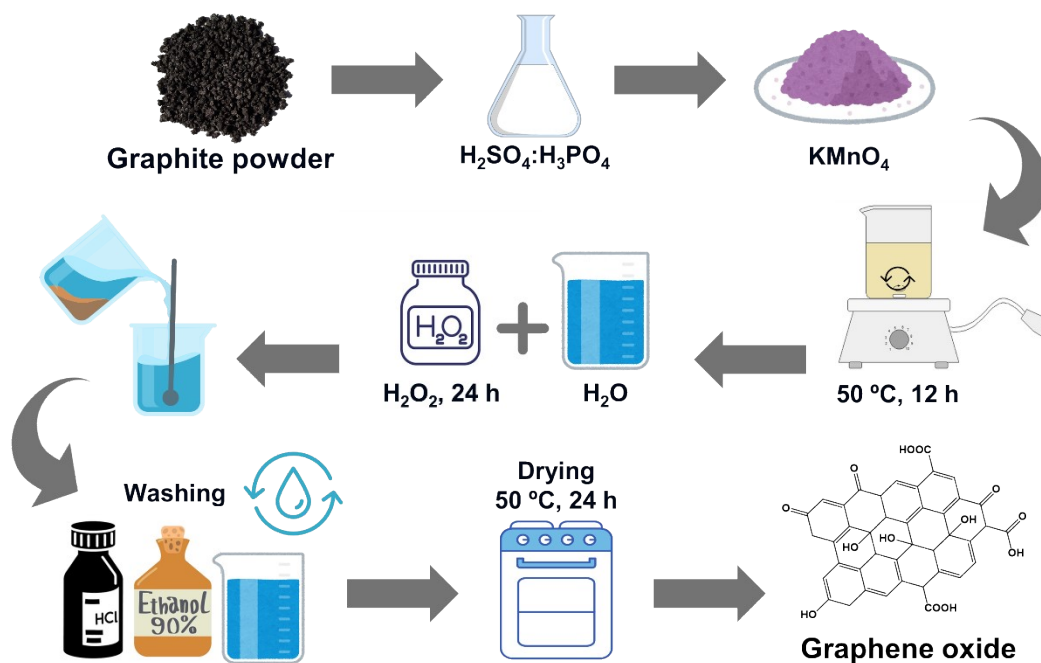

Figure S1. Scheme of the synthesis of graphene oxide using a Hummers modified method.

## SEM Analyses

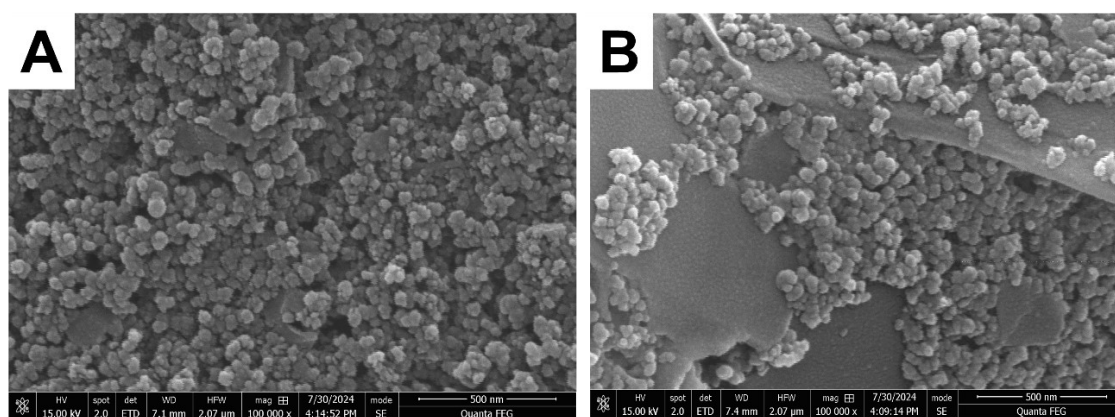

Figure S2. SEM images obtained with magnification of 100,000 $\times$  for the (A) SPCE and rGO-SPCE surfaces.

## Water Contact Angle Study

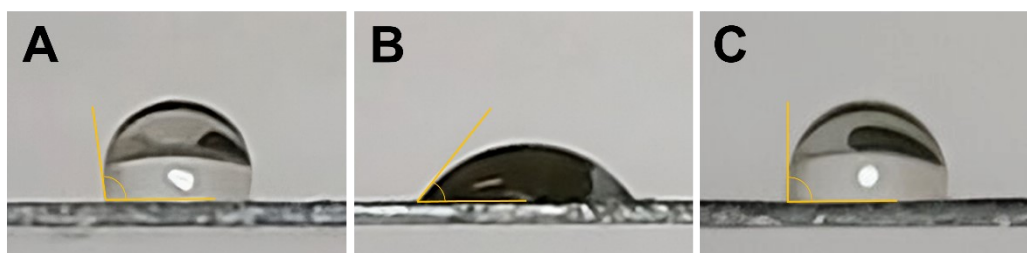

Figure S3. Water contact angle measurements performed for the SPCE (A), GO-SPCE (B), and rGO-SPCE (C) surfaces.

## Influence of the SPCE modified with rGO

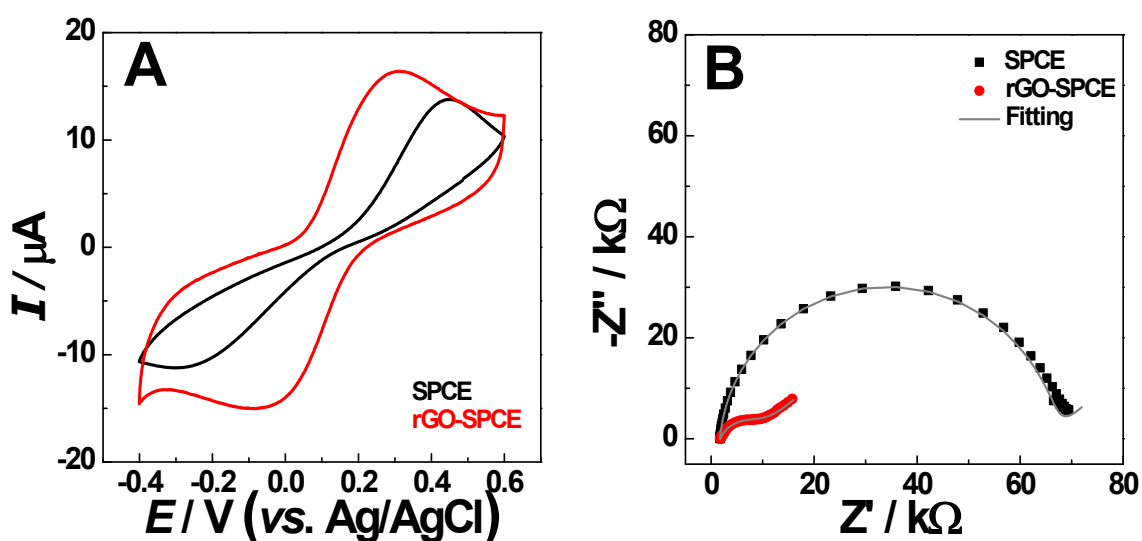

Figure S4. (A) Cyclic voltammograms at  $25 \text{ mV s}^{-1}$  and (B) electrochemical impedance spectra obtained for SPCE before and after rGO modification in  $1.0 \text{ mmol L}^{-1}$  potassium hexacyanoferrate (II). Fitting (gray line) was obtained against the equivalent Randles circuit. Supporting electrolyte:  $0.10 \text{ mol L}^{-1}$  KCl.

Table S1. Voltammetric and impedimetric behaviour obtained for the SPCE before and after rGO modification in  $1.0 \text{ mmol L}^{-1}$  potassium hexacyanoferrate (II).

| Electrode | $I_{pa}$ ( $\mu\text{A}$ ) | $I_{pc}$ ( $\mu\text{A}$ ) | $\Delta E_p$ (mV) | $R_{ct}$ ( $k\Omega$ ) |
|-----------|----------------------------|----------------------------|-------------------|------------------------|
| SPCE      | 8.24                       | 5.39                       | 0.662             | 64.5                   |
| rGO-SPCE  | 12.6                       | 11.0                       | 0.320             | 8.53                   |

$I_{pa}$ : Anodic peak current;  $I_{pc}$ : Cathodic peak current;  $\Delta E_p$ : Peak-to-peak separation;  $R_{ct}$ : Charge-transfer resistance.

## Scan Rate Study

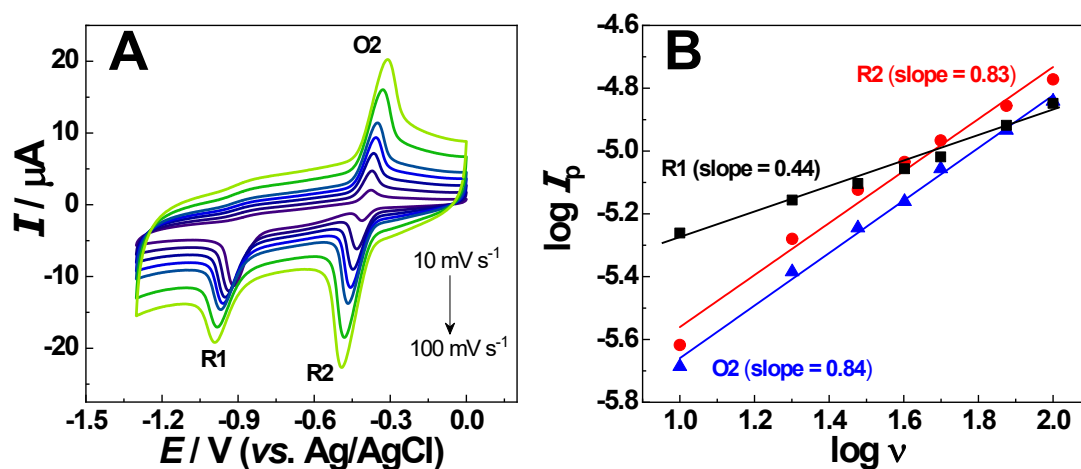

Figure S5. Scan rate study performed using the SPCE in the presence of  $100 \mu\text{mol L}^{-1}$  paraoxon. (A) Cyclic voltammograms and (B)  $\log v$  versus  $\log I_p$  plot obtained for the reversible redox peaks (O2 and R2).

## Influence of pH

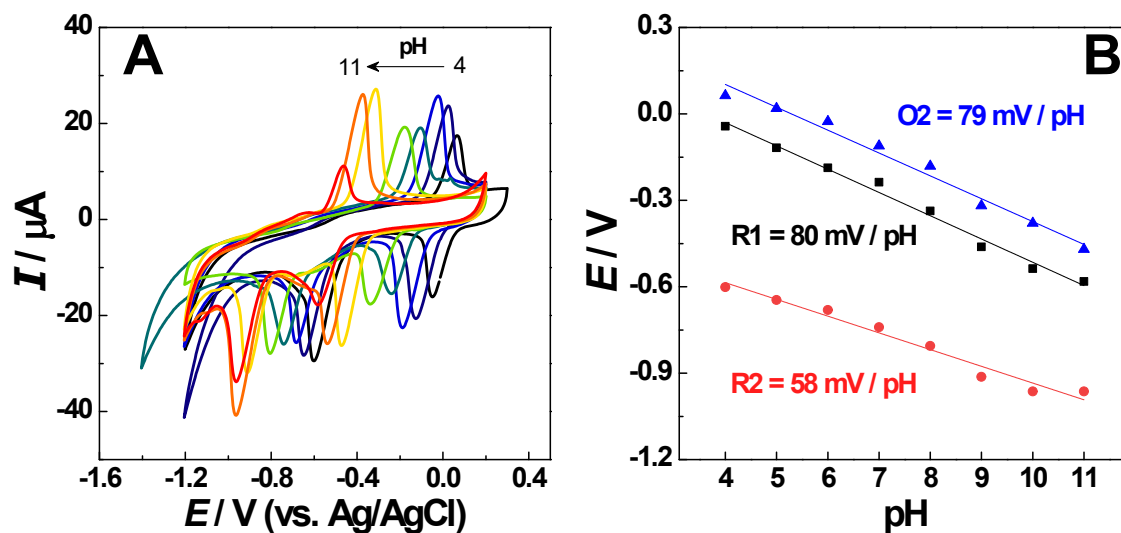

Figure S6. Influence of pH (4–11) for the determination of  $100 \mu\text{mol L}^{-1}$  paraoxon using the unmodified SPCE.

## Pulse Current Response

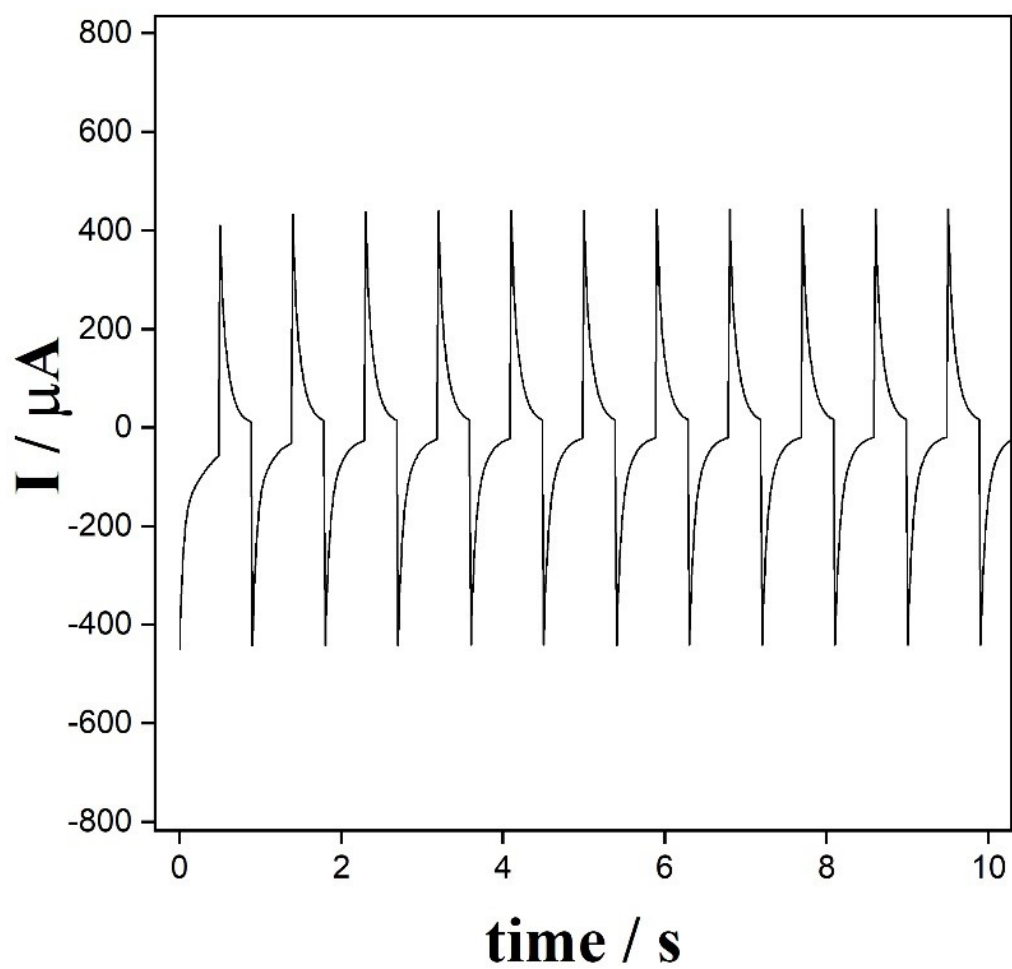

Figure S7. Current response of preconcentration step at the presence of  $20 \mu\text{mol L}^{-1}$  paraoxon. Pulse cycle consist of 500 ms at  $-1.0 \text{ V}$  and 200 ms at  $0.0 \text{ V}$ . Supporting electrolyte:  $0.10 \text{ mol L}^{-1}$  BR buffer, pH 9.0.

## Interferents Study

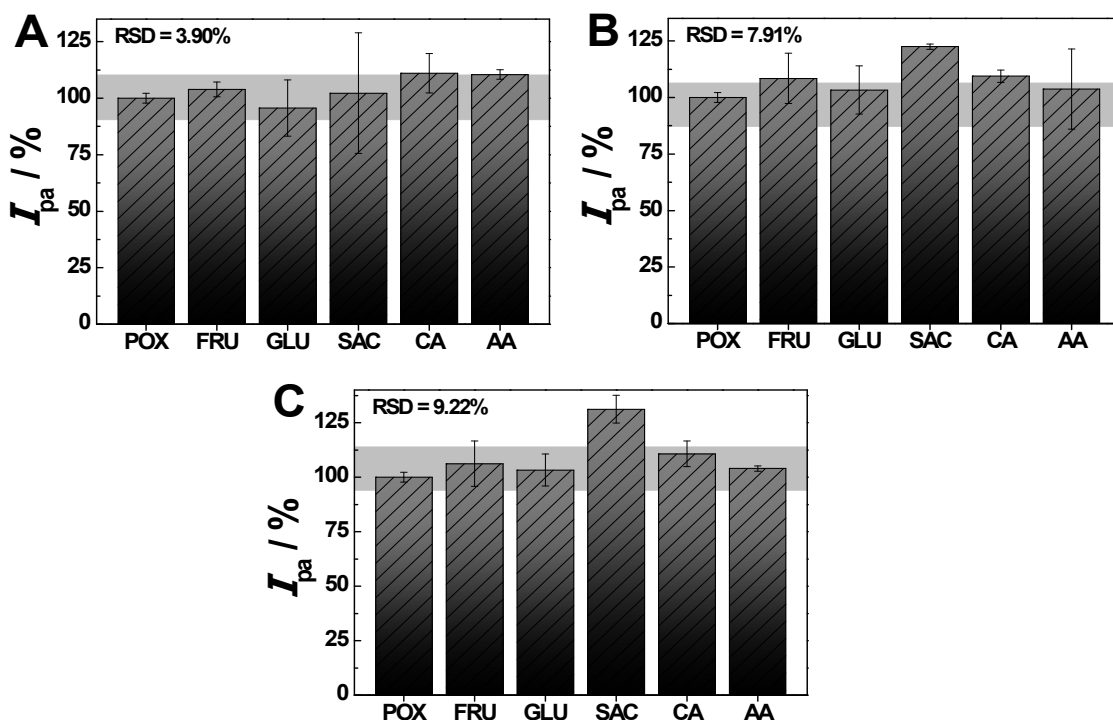

Figure S8. Signal variation obtained for the determination of 10  $\mu\text{mol L}^{-1}$  paraoxon in the presence of interferent species (fructose, glucose, sucrose, citric acid, and ascorbic acid) at three levels of concentration: (A) 1.0, (B) 10, and (C) 100  $\mu\text{mol L}^{-1}$ .

Table S2. Signal variation obtained for the determination of paraoxon in the presence of interferent species (n = 3).

| Interferent   | Concentration              |                           |                            |
|---------------|----------------------------|---------------------------|----------------------------|
|               | 1.0 $\mu\text{mol L}^{-1}$ | 10 $\mu\text{mol L}^{-1}$ | 100 $\mu\text{mol L}^{-1}$ |
| Fructose      | +3.90                      | +8.46                     | +6.20                      |
| Glucose       | -4.36                      | +3.33                     | +3.28                      |
| Sucrose       | +2.24                      | +22.5                     | +31.2                      |
| Citric acid   | +11.1                      | +9.43                     | +10.7                      |
| Ascorbic acid | +10.5                      | +3.75                     | +4.00                      |
